# Supplementary material for: Environmental temperature variation influences fitness trade-offs and tolerance in a fish-tapeworm association
Source: PubMed Central journal article supplement (PMC5455083; doi:10.1186/s13071-017-2192-7), 2017-06-02
Supplement: 13071_2017_2192_MOESM1_ESM.pdf [file 13071_2017_2192_MOESM1_ESM.pdf]

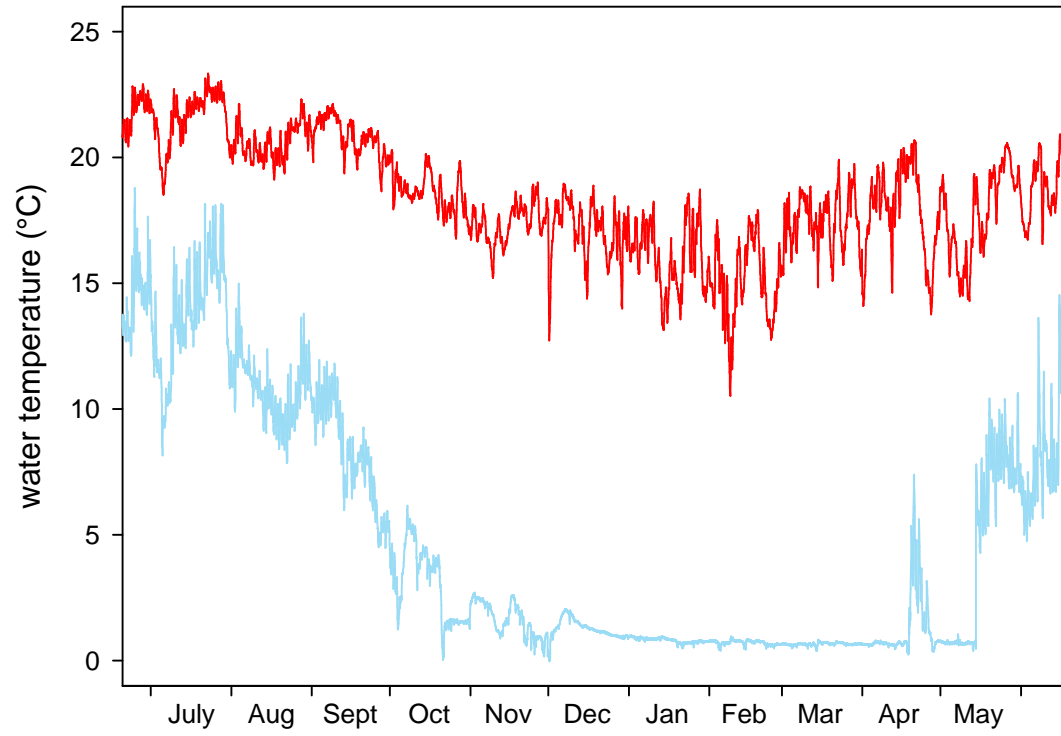

**Figure S1.** Water temperature in Lake Mývatn at the cold (blue) and warm (red) sampling site from 20/06/14 to 19/06/15.

**Table S1.** Linear models (LMs) on host and parasite body condition parameters and host immunity. Simple comparisons for all interpretable interactions (I1 - I13) can be found in Table S2. *Symbols:* ‘-’; not included into the model, ‘n. s.’; not significant ( $P > 0.050$ ), ‘(...)’, not interpretable because of a significant higher level interaction effect.

|                                                                    | models include all uninfected sticklebacks (sham-exposed and exposed but not infected) |                                |                                    |                                   | model includes all parasite exposed sticklebacks (exposed but not infected and infected) |                                    |                                     |                                    | parasite weight                 |
|--------------------------------------------------------------------|----------------------------------------------------------------------------------------|--------------------------------|------------------------------------|-----------------------------------|------------------------------------------------------------------------------------------|------------------------------------|-------------------------------------|------------------------------------|---------------------------------|
|                                                                    | host length increase                                                                   | host gonad weight              | number of viable HKLs              | respiratory burst activity        | host length increase                                                                     | host gonad weight                  | number of viable HKLs               | respiratory burst activity         |                                 |
| experimental temperature                                           | $F_{1,162} = 158.12, P < 0.001$                                                        | $F_{1,162} = 66.31, P < 0.001$ | ( $F_{1,162} = 23.48, P < 0.001$ ) | $F_{1,143} = 34.62, P < 0.001$    | $F_{1,282} = 265.50, P < 0.001$                                                          | $F_{1,282} = 169.56, P < 0.001$    | ( $F_{1,282} = 140.65, P < 0.001$ ) | $F_{1,252} = 51.31, P < 0.001$     | $F_{1,188} = 266.95, P < 0.001$ |
| host gender                                                        | ( $F_{1,162} = 4.82, P = 0.030$ )                                                      | $F_{1,162} = 75.30, P < 0.001$ | n. s.                              | ( $F_{1,143} = 5.14, P = 0.025$ ) | $F_{1,282} = 7.68, P = 0.006$                                                            | $F_{1,282} = 206.63, P < 0.001$    | n. s.                               | ( $F_{1,252} = 9.54, P = 0.002$ )  | $F_{1,188} = 7.08, P = 0.008$   |
| host infection status                                              | n. s.                                                                                  | n. s.                          | n. s.                              | n. s.                             | $F_{1,282} = 51.43, P < 0.001$                                                           | n. s.                              | ( $F_{1,282} = 43.38, P < 0.001$ )  | $F_{1,252} = 51.87, P < 0.001$     | -                               |
| host origin                                                        | n. s.                                                                                  | n. s.                          | ( $F_{1,162} = 5.77, P = 0.017$ )  | n. s.                             | ( $F_{1,282} = 11.55, P = 0.001$ )                                                       | n. s.                              | n. s.                               | n. s.                              | n. s.                           |
| parasite origin                                                    | -                                                                                      | -                              | -                                  | -                                 | n. s.                                                                                    | n. s.                              | n. s.                               | n. s.                              | n. s.                           |
| experimental temperature × host gender                             | I1: $F_{1,162} = 5.25, P = 0.023$                                                      | n. s.                          | I2: $F_{1,162} = 8.90, P = 0.003$  | I5: $F_{1,143} = 5.93, P = 0.016$ | n. s.                                                                                    | I7: $F_{1,282} = 9.53, P = 0.002$  | ( $F_{1,282} = 6.11, P = 0.014$ )   | I12: $F_{1,252} = 5.33, P = 0.022$ | n. s.                           |
| experimental temperature × host infection status                   | n. s.                                                                                  | n. s.                          | I3: $F_{1,162} = 7.86, P = 0.006$  | n. s.                             | n. s.                                                                                    | n. s.                              | ( $F_{1,282} = 10.36, P = 0.001$ )  | n. s.                              | -                               |
| experimental temperature × host origin                             | n. s.                                                                                  | n. s.                          | I4: $F_{1,162} = 4.04, P = 0.046$  | n. s.                             | n. s.                                                                                    | n. s.                              | n. s.                               | n. s.                              | n. s.                           |
| experimental temperature × parasite origin                         | -                                                                                      | -                              | -                                  | -                                 | n. s.                                                                                    | n. s.                              | n. s.                               | n. s.                              | n. s.                           |
| host gender × host infection status                                | n. s.                                                                                  | n. s.                          | n. s.                              | n. s.                             | n. s.                                                                                    | n. s.                              | n. s.                               | n. s.                              | -                               |
| host gender × host origin                                          | n. s.                                                                                  | n. s.                          | n. s.                              | n. s.                             | n. s.                                                                                    | n. s.                              | n. s.                               | n. s.                              | n. s.                           |
| host gender × parasite origin                                      | -                                                                                      | -                              | -                                  | -                                 | n. s.                                                                                    | n. s.                              | n. s.                               | n. s.                              | n. s.                           |
| host infection status × host origin                                | n. s.                                                                                  | n. s.                          | n. s.                              | n. s.                             | n. s.                                                                                    | n. s.                              | I10: $F_{1,282} = 14.32, P < 0.001$ | n. s.                              | -                               |
| host infection status × parasite origin                            | -                                                                                      | -                              | -                                  | -                                 | n. s.                                                                                    | n. s.                              | n. s.                               | n. s.                              | -                               |
| host origin × parasite origin                                      | -                                                                                      | -                              | -                                  | -                                 | n. s.                                                                                    | n. s.                              | n. s.                               | n. s.                              | n. s.                           |
| experimental temperature × host gender × host infection status     | n. s.                                                                                  | n. s.                          | n. s.                              | n. s.                             | n. s.                                                                                    | I8: $F_{1,282} = 9.953, P = 0.002$ | I11: $F_{1,282} = 4.740, P = 0.030$ | n. s.                              | -                               |
| experimental temperature × host gender × host origin               | n. s.                                                                                  | n. s.                          | n. s.                              | n. s.                             | n. s.                                                                                    | n. s.                              | n. s.                               | n. s.                              | n. s.                           |
| experimental temperature × host gender × parasite origin           | -                                                                                      | -                              | -                                  | -                                 | n. s.                                                                                    | n. s.                              | n. s.                               | n. s.                              | n. s.                           |
| experimental temperature × host infection status × host origin     | n. s.                                                                                  | n. s.                          | n. s.                              | n. s.                             | n. s.                                                                                    | n. s.                              | n. s.                               | n. s.                              | -                               |
| experimental temperature × host infection status × parasite origin | -                                                                                      | -                              | -                                  | -                                 | n. s.                                                                                    | n. s.                              | n. s.                               | n. s.                              | -                               |
| experimental temperature × host origin × parasite origin           | -                                                                                      | -                              | -                                  | -                                 | n. s.                                                                                    | n. s.                              | n. s.                               | n. s.                              | n. s.                           |
| host gender × host infection status × host origin                  | n. s.                                                                                  | n. s.                          | n. s.                              | n. s.                             | n. s.                                                                                    | n. s.                              | n. s.                               | I13: $F_{1,252} = 4.06, P = 0.045$ | -                               |
| host gender × host infection status × parasite origin              | -                                                                                      | -                              | -                                  | -                                 | n. s.                                                                                    | n. s.                              | n. s.                               | n. s.                              | -                               |
| host gender × host origin × parasite origin                        | -                                                                                      | -                              | -                                  | -                                 | n. s.                                                                                    | n. s.                              | n. s.                               | n. s.                              | n. s.                           |
| host infection status × host origin × parasite origin              | -                                                                                      | -                              | -                                  | -                                 | I6: $F_{1,282} = 5.40, P = 0.021$                                                        | I9: $F_{1,282} = 4.25, P = 0.040$  | n. s.                               | n. s.                              | -                               |

**Table S2.** Simple comparisons for significant, interpretable interactions (see Table S1 for an overview of all significant effects). *Symbols:* 'n. s.', not significant ( $P > 0.050$ ).

| interaction (see table S1)                                                                                                           | 1st interaction effect                                                                                                             | 2nd interaction effect       | 3rd interaction effect       | P-value                      | interaction (see table S1) | 1st interaction effect | 2nd interaction effect | 3rd interaction effect | P-value |
|--------------------------------------------------------------------------------------------------------------------------------------|------------------------------------------------------------------------------------------------------------------------------------|------------------------------|------------------------------|------------------------------|----------------------------|------------------------|------------------------|------------------------|---------|
| <b>I1</b><br>model on host length increase<br>exp. temperature × host gender<br>$F_{1,162} = 5.25, P = 0.023$                        | <b>exp. temperature</b>                                                                                                            | <b>host gender</b>           | -                            |                              |                            |                        |                        |                        |         |
|                                                                                                                                      | 13 °C                                                                                                                              | male vs. female              |                              | n. s.                        |                            |                        |                        |                        |         |
|                                                                                                                                      | 24 °C                                                                                                                              | male vs. female              |                              | 0.002                        |                            |                        |                        |                        |         |
|                                                                                                                                      | <b>host gender</b>                                                                                                                 | <b>exp. temperature</b>      | -                            |                              |                            |                        |                        |                        |         |
| male                                                                                                                                 | 13 °C vs. 24 °C                                                                                                                    |                              | < 0.001                      |                              |                            |                        |                        |                        |         |
| female                                                                                                                               | 13 °C vs. 24 °C                                                                                                                    |                              | < 0.001                      |                              |                            |                        |                        |                        |         |
| <b>I2</b><br>model on number of viable HKLs<br>exp. temperature × host gender<br>$F_{1,162} = 8.90, P = 0.003$                       | <b>exp. temperature</b>                                                                                                            | <b>host gender</b>           | -                            |                              |                            |                        |                        |                        |         |
|                                                                                                                                      | 13 °C                                                                                                                              | male vs. female              |                              | 0.043                        |                            |                        |                        |                        |         |
|                                                                                                                                      | 24 °C                                                                                                                              | male vs. female              |                              | 0.038                        |                            |                        |                        |                        |         |
|                                                                                                                                      | <b>host gender</b>                                                                                                                 | <b>exp. temperature</b>      | -                            |                              |                            |                        |                        |                        |         |
| male                                                                                                                                 | 13 °C vs. 24 °C                                                                                                                    |                              | < 0.001                      |                              |                            |                        |                        |                        |         |
| female                                                                                                                               | 13 °C vs. 24 °C                                                                                                                    |                              | n. s.                        |                              |                            |                        |                        |                        |         |
| <b>I3</b><br>model on number of viable HKLs<br>exp. temperature × host infection status<br>$F_{1,162} = 7.86, P = 0.006$             | <b>exp. temperature</b>                                                                                                            | <b>host infection status</b> | -                            |                              |                            |                        |                        |                        |         |
|                                                                                                                                      | 13 °C                                                                                                                              | sham vs. exposed             |                              | 0.014                        |                            |                        |                        |                        |         |
|                                                                                                                                      | 24 °C                                                                                                                              | sham vs. exposed             |                              | n. s.                        |                            |                        |                        |                        |         |
|                                                                                                                                      | <b>host infection status</b>                                                                                                       | <b>exp. temperature</b>      | -                            |                              |                            |                        |                        |                        |         |
| sham                                                                                                                                 | 13 °C vs. 24 °C                                                                                                                    |                              | n. s.                        |                              |                            |                        |                        |                        |         |
| exposed                                                                                                                              | 13 °C vs. 24 °C                                                                                                                    |                              | < 0.001                      |                              |                            |                        |                        |                        |         |
| <b>I4</b><br>model on number of viable HKLs<br>exp. temperature × host origin<br>$F_{1,162} = 4.04, P = 0.046$                       | <b>exp. temperature</b>                                                                                                            | <b>host origin</b>           | -                            |                              |                            |                        |                        |                        |         |
|                                                                                                                                      | 13 °C                                                                                                                              | cold vs. warm                |                              | n. s.                        |                            |                        |                        |                        |         |
|                                                                                                                                      | 24 °C                                                                                                                              | cold vs. warm                |                              | 0.002                        |                            |                        |                        |                        |         |
|                                                                                                                                      | <b>host origin</b>                                                                                                                 | <b>exp. temperature</b>      | -                            |                              |                            |                        |                        |                        |         |
| cold                                                                                                                                 | 13 °C vs. 24 °C                                                                                                                    |                              | < 0.001                      |                              |                            |                        |                        |                        |         |
| warm                                                                                                                                 | 13 °C vs. 24 °C                                                                                                                    |                              | 0.045                        |                              |                            |                        |                        |                        |         |
| <b>I5</b><br>model on respiratory burst activity<br>exp. temperature × host gender<br>$F_{1,143} = 5.93, P = 0.016$                  | <b>exp. temperature</b>                                                                                                            | <b>host gender</b>           | -                            |                              |                            |                        |                        |                        |         |
|                                                                                                                                      | 13 °C                                                                                                                              | male vs. female              |                              | < 0.001                      |                            |                        |                        |                        |         |
|                                                                                                                                      | 24 °C                                                                                                                              | male vs. female              |                              | n. s.                        |                            |                        |                        |                        |         |
|                                                                                                                                      | <b>host gender</b>                                                                                                                 | <b>exp. temperature</b>      | -                            |                              |                            |                        |                        |                        |         |
| male                                                                                                                                 | 13 °C vs. 24 °C                                                                                                                    |                              | 0.023                        |                              |                            |                        |                        |                        |         |
| female                                                                                                                               | 13 °C vs. 24 °C                                                                                                                    |                              | < 0.001                      |                              |                            |                        |                        |                        |         |
| <b>I6</b><br>model on host length increase<br>host infection status × host origin × parasite origin<br>$F_{1,282} = 5.40, P = 0.021$ | <b>host infection status</b>                                                                                                       | <b>host origin</b>           | <b>parasite origin</b>       |                              |                            |                        |                        |                        |         |
|                                                                                                                                      | exposed                                                                                                                            | cold                         | cold vs. warm                | n. s.                        |                            |                        |                        |                        |         |
|                                                                                                                                      | exposed                                                                                                                            | warm                         | cold vs. warm                | n. s.                        |                            |                        |                        |                        |         |
|                                                                                                                                      | infected                                                                                                                           | cold                         | cold vs. warm                | n. s.                        |                            |                        |                        |                        |         |
|                                                                                                                                      | infected                                                                                                                           | warm                         | cold vs. warm                | n. s.                        |                            |                        |                        |                        |         |
|                                                                                                                                      | <b>host infection status</b>                                                                                                       | <b>parasite origin</b>       | <b>host origin</b>           |                              |                            |                        |                        |                        |         |
|                                                                                                                                      | exposed                                                                                                                            | cold                         | cold vs. warm                | n. s.                        |                            |                        |                        |                        |         |
|                                                                                                                                      | exposed                                                                                                                            | warm                         | cold vs. warm                | 0.020                        |                            |                        |                        |                        |         |
|                                                                                                                                      | infected                                                                                                                           | cold                         | cold vs. warm                | 0.001                        |                            |                        |                        |                        |         |
|                                                                                                                                      | infected                                                                                                                           | warm                         | cold vs. warm                | n. s.                        |                            |                        |                        |                        |         |
|                                                                                                                                      | <b>host origin</b>                                                                                                                 | <b>parasite origin</b>       | <b>host infection status</b> |                              |                            |                        |                        |                        |         |
|                                                                                                                                      | cold                                                                                                                               | cold                         | exposed vs. infected         | 0.014                        |                            |                        |                        |                        |         |
| cold                                                                                                                                 | warm                                                                                                                               | exposed vs. infected         | < 0.001                      |                              |                            |                        |                        |                        |         |
| warm                                                                                                                                 | cold                                                                                                                               | exposed vs. infected         | < 0.001                      |                              |                            |                        |                        |                        |         |
| warm                                                                                                                                 | warm                                                                                                                               | exposed vs. infected         | 0.020                        |                              |                            |                        |                        |                        |         |
| <b>I7</b><br>model on host gonad weight<br>exp. temperature × host gender<br>$F_{1,282} = 9.53, P = 0.002$                           | <b>exp. temperature</b>                                                                                                            | <b>host gender</b>           | -                            |                              |                            |                        |                        |                        |         |
|                                                                                                                                      | 13 °C                                                                                                                              | male vs. female              |                              | < 0.001                      |                            |                        |                        |                        |         |
|                                                                                                                                      | 24 °C                                                                                                                              | male vs. female              |                              | < 0.001                      |                            |                        |                        |                        |         |
|                                                                                                                                      | <b>host gender</b>                                                                                                                 | <b>exp. temperature</b>      | -                            |                              |                            |                        |                        |                        |         |
|                                                                                                                                      | male                                                                                                                               | 13 °C vs. 24 °C              |                              | < 0.001                      |                            |                        |                        |                        |         |
|                                                                                                                                      | female                                                                                                                             | 13 °C vs. 24 °C              |                              | < 0.001                      |                            |                        |                        |                        |         |
|                                                                                                                                      | <b>I8</b><br>model on host gonad weight<br>exp. temperature × host gender × host infection status<br>$F_{1,282} = 9.95, P = 0.002$ | <b>exp. temperature</b>      | <b>host gender</b>           | <b>host infection status</b> |                            |                        |                        |                        |         |
|                                                                                                                                      |                                                                                                                                    | 13 °C                        | male                         | exposed vs. infected         | n. s.                      |                        |                        |                        |         |
|                                                                                                                                      |                                                                                                                                    | 13 °C                        | female                       | exposed vs. infected         | 0.008                      |                        |                        |                        |         |
|                                                                                                                                      |                                                                                                                                    | 24 °C                        | male                         | exposed vs. infected         | n. s.                      |                        |                        |                        |         |
|                                                                                                                                      |                                                                                                                                    | 24 °C                        | female                       | exposed vs. infected         | 0.016                      |                        |                        |                        |         |
|                                                                                                                                      |                                                                                                                                    | <b>exp. temperature</b>      | <b>host infection status</b> | <b>host gender</b>           |                            |                        |                        |                        |         |
| 13 °C                                                                                                                                |                                                                                                                                    | exposed                      | male vs. female              | < 0.001                      |                            |                        |                        |                        |         |
| 13 °C                                                                                                                                |                                                                                                                                    | infected                     | male vs. female              | < 0.001                      |                            |                        |                        |                        |         |
| 24 °C                                                                                                                                |                                                                                                                                    | exposed                      | male vs. female              | < 0.001                      |                            |                        |                        |                        |         |
| 24 °C                                                                                                                                |                                                                                                                                    | infected                     | male vs. female              | < 0.001                      |                            |                        |                        |                        |         |
| <b>host gender</b>                                                                                                                   |                                                                                                                                    | <b>host infection status</b> | <b>exp. temperature</b>      |                              |                            |                        |                        |                        |         |
| male                                                                                                                                 |                                                                                                                                    | exposed                      | 13 °C vs 24 °C               | < 0.001                      |                            |                        |                        |                        |         |
| female                                                                                                                               | infected                                                                                                                           | 13 °C vs 24 °C               | < 0.001                      |                              |                            |                        |                        |                        |         |
| female                                                                                                                               | exposed                                                                                                                            | 13 °C vs 24 °C               | < 0.001                      |                              |                            |                        |                        |                        |         |
| female                                                                                                                               | infected                                                                                                                           | 13 °C vs 24 °C               | < 0.001                      |                              |                            |                        |                        |                        |         |
| <b>I9</b><br>model on host gonad weight<br>host infection status × host origin × parasite origin<br>$F_{1,282} = 4.25, P = 0.040$    | <b>host infection status</b>                                                                                                       | <b>host origin</b>           | <b>parasite origin</b>       |                              |                            |                        |                        |                        |         |
|                                                                                                                                      | exposed                                                                                                                            | cold                         | cold vs. warm                | n. s.                        |                            |                        |                        |                        |         |
|                                                                                                                                      | exposed                                                                                                                            | warm                         | cold vs. warm                | n. s.                        |                            |                        |                        |                        |         |
|                                                                                                                                      | infected                                                                                                                           | cold                         | cold vs. warm                | n. s.                        |                            |                        |                        |                        |         |
|                                                                                                                                      | infected                                                                                                                           | warm                         | cold vs. warm                | n. s.                        |                            |                        |                        |                        |         |
|                                                                                                                                      | <b>host infection status</b>                                                                                                       | <b>parasite origin</b>       | <b>host origin</b>           |                              |                            |                        |                        |                        |         |
|                                                                                                                                      | exposed                                                                                                                            | cold                         | cold vs. warm                | n. s.                        |                            |                        |                        |                        |         |
|                                                                                                                                      | exposed                                                                                                                            | warm                         | cold vs. warm                | n. s.                        |                            |                        |                        |                        |         |
|                                                                                                                                      | infected                                                                                                                           | cold                         | cold vs. warm                | 0.047                        |                            |                        |                        |                        |         |
|                                                                                                                                      | infected                                                                                                                           | warm                         | cold vs. warm                | n. s.                        |                            |                        |                        |                        |         |
|                                                                                                                                      | <b>host origin</b>                                                                                                                 | <b>parasite origin</b>       | <b>host infection status</b> |                              |                            |                        |                        |                        |         |
|                                                                                                                                      | cold                                                                                                                               | cold                         | exposed vs. infected         | 0.022                        |                            |                        |                        |                        |         |
| cold                                                                                                                                 | warm                                                                                                                               | exposed vs. infected         | n. s.                        |                              |                            |                        |                        |                        |         |
| warm                                                                                                                                 | cold                                                                                                                               | exposed vs. infected         | n. s.                        |                              |                            |                        |                        |                        |         |
| warm                                                                                                                                 | warm                                                                                                                               | exposed vs. infected         | n. s.                        |                              |                            |                        |                        |                        |         |
| <b>I10</b><br>model on number of viable HKLs<br>host infection status × host origin<br>$F_{1,282} = 14.32, P < 0.001$                | <b>host infection status</b>                                                                                                       | <b>host origin</b>           | -                            |                              |                            |                        |                        |                        |         |
|                                                                                                                                      | exposed                                                                                                                            | cold vs. warm                |                              | 0.001                        |                            |                        |                        |                        |         |
|                                                                                                                                      | infected                                                                                                                           | cold vs. warm                |                              | n. s.                        |                            |                        |                        |                        |         |
|                                                                                                                                      | <b>host origin</b>                                                                                                                 | <b>host infection status</b> | -                            |                              |                            |                        |                        |                        |         |
| cold                                                                                                                                 | exposed vs. infected                                                                                                               |                              | < 0.001                      |                              |                            |                        |                        |                        |         |
| warm                                                                                                                                 | exposed vs. infected                                                                                                               |                              | 0.050                        |                              |                            |                        |                        |                        |         |

| Interaction (see table S1)                                                                                                              | 1st interaction effect       | 2nd interaction effect       | 3rd interaction effect       | P-value |
|-----------------------------------------------------------------------------------------------------------------------------------------|------------------------------|------------------------------|------------------------------|---------|
| <b>I11</b><br>model on number of viable HKLs<br>exp. temperature × host gender × host infection status<br>$F_{1,282} = 4.74, P = 0.030$ | <b>exp. temperature</b>      | <b>host gender</b>           | <b>host infection status</b> |         |
|                                                                                                                                         | 13 °C                        | male                         | exposed vs. infected         | < 0.001 |
|                                                                                                                                         | 13 °C                        | female                       | exposed vs. infected         | < 0.001 |
|                                                                                                                                         | 24 °C                        | male                         | exposed vs. infected         | 0.005   |
|                                                                                                                                         | 24 °C                        | female                       | exposed vs. infected         | n. s.   |
|                                                                                                                                         | <b>exp. temperature</b>      | <b>host infection status</b> | <b>host gender</b>           |         |
|                                                                                                                                         | 13 °C                        | exposed                      | male vs. female              | 0.020   |
|                                                                                                                                         | 13 °C                        | infected                     | male vs. female              | n. s.   |
|                                                                                                                                         | 24 °C                        | exposed                      | male vs. female              | n. s.   |
|                                                                                                                                         | 24 °C                        | infected                     | male vs. female              | n. s.   |
|                                                                                                                                         | <b>host gender</b>           | <b>host infection status</b> | <b>exp. temperature</b>      |         |
|                                                                                                                                         | male                         | exposed                      | 13 °C vs 24 °C               | < 0.001 |
|                                                                                                                                         | male                         | infected                     | 13 °C vs 24 °C               | < 0.001 |
| female                                                                                                                                  | exposed                      | 13 °C vs 24 °C               | n. s.                        |         |
| female                                                                                                                                  | infected                     | 13 °C vs 24 °C               | < 0.001                      |         |
| <b>I12</b><br>model on respiratory burst activity<br>exp. temperature × host gender<br>$F_{1,252} = 5.33, P = 0,022$                    | <b>exp. temperature</b>      | <b>host gender</b>           | -                            |         |
|                                                                                                                                         | 13 °C                        | male vs. female              |                              | < 0.001 |
|                                                                                                                                         | 24 °C                        | male vs. female              |                              | n. s.   |
|                                                                                                                                         | <b>host gender</b>           | <b>exp. temperature</b>      | -                            |         |
|                                                                                                                                         | male                         | 13 °C vs. 24 °C              |                              | 0.002   |
|                                                                                                                                         | female                       | 13 °C vs. 24 °C              |                              | < 0.001 |
| <b>I13</b><br>model on respiratory burst activity<br>host gender × host infection status × host origin<br>$F_{1,252} = 4.06, P = 0.045$ | <b>host gender</b>           | <b>host infection status</b> | <b>host origin</b>           |         |
|                                                                                                                                         | male                         | exposed                      | cold vs. warm                | n. s.   |
|                                                                                                                                         | male                         | infected                     | cold vs. warm                | n. s.   |
|                                                                                                                                         | female                       | exposed                      | cold vs. warm                | 0.008   |
|                                                                                                                                         | female                       | infected                     | cold vs. warm                | n. s.   |
|                                                                                                                                         | <b>host gender</b>           | <b>host origin</b>           | <b>host infection status</b> |         |
|                                                                                                                                         | male                         | cold                         | exposed vs. infected         | < 0.001 |
|                                                                                                                                         | male                         | warm                         | exposed vs. infected         | 0.001   |
|                                                                                                                                         | female                       | cold                         | exposed vs. infected         | 0.034   |
|                                                                                                                                         | female                       | warm                         | exposed vs. infected         | < 0.001 |
|                                                                                                                                         | <b>host infection status</b> | <b>host origin</b>           | <b>host gender</b>           |         |
|                                                                                                                                         | exposed                      | cold                         | male vs. female              | 0.001   |
|                                                                                                                                         | exposed                      | warm                         | male vs. female              | n. s.   |
| infected                                                                                                                                | cold                         | male vs. female              | n. s.                        |         |
| infected                                                                                                                                | warm                         | male vs. female              | n. s.                        |         |

**Table S3.** Linear models (LMs) on host tolerance. *Symbols:* ‘-’, not included into the model; ‘n. s.’, not significant ( $P > 0.050$ ).

|                                                                 | including host/parasite origins |                                | including sympatry/allopatry   |                                |
|-----------------------------------------------------------------|---------------------------------|--------------------------------|--------------------------------|--------------------------------|
|                                                                 | host health tolerance           | host fecundity tolerance       | host health tolerance          | host fecundity tolerance       |
| experimental temperature                                        | $F_{1,177} = 25.35, P < 0.001$  | $F_{1,177} = 10.71, P = 0.001$ | $F_{1,188} = 21.09, P < 0.001$ | $F_{1,188} = 10.19, P = 0.002$ |
| host gender                                                     | n. s.                           | $F_{1,177} = 18.92, P < 0.001$ | $F_{1,188} = 4.11, P = 0.044$  | $F_{1,188} = 29.70, P < 0.001$ |
| host origin                                                     | n. s.                           | n. s.                          | -                              | -                              |
| parasite origin                                                 | n. s.                           | n. s.                          | -                              | -                              |
| parasite weight                                                 | n. s.                           | n. s.                          | n. s.                          | n. s.                          |
| sympatry/allopatry                                              | -                               | -                              | n. s.                          | n. s.                          |
| experimental temperature × host gender                          | n. s.                           | n. s.                          | n. s.                          | n. s.                          |
| experimental temperature × host origin                          | n. s.                           | n. s.                          | -                              | -                              |
| experimental temperature × parasite origin                      | $F_{1,177} = 5.97, P = 0.015$   | n. s.                          | -                              | -                              |
| experimental temperature × parasite weight                      | n. s.                           | n. s.                          | n. s.                          | n. s.                          |
| experimental temperature × sympatry/allopatry                   | -                               | -                              | n. s.                          | n. s.                          |
| host gender × host origin                                       | n. s.                           | n. s.                          | -                              | -                              |
| host gender × parasite origin                                   | n. s.                           | n. s.                          | -                              | -                              |
| host gender × parasite weight                                   | n. s.                           | n. s.                          | n. s.                          | n. s.                          |
| host gender × sympatry/allopatry                                | -                               | -                              | n. s.                          | n. s.                          |
| host origin × parasite origin                                   | n. s.                           | n. s.                          | -                              | -                              |
| host origin × parasite weight                                   | n. s.                           | n. s.                          | -                              | -                              |
| parasite origin × parasite weight                               | n. s.                           | n. s.                          | -                              | -                              |
| parasite weight × sympatry/allopatry                            | -                               | -                              | n. s.                          | n. s.                          |
| experimental temperature × host gender × host origin            | n. s.                           | n. s.                          | -                              | -                              |
| experimental temperature × host gender × parasite origin        | n. s.                           | n. s.                          | -                              | -                              |
| experimental temperature × host gender × parasite weight        | n. s.                           | n. s.                          | n. s.                          | n. s.                          |
| experimental temperature × host gender × sympatry/allopatry     | -                               | -                              | n. s.                          | n. s.                          |
| experimental temperature × host origin × parasite origin        | n. s.                           | n. s.                          | -                              | -                              |
| experimental temperature × host origin × parasite weight        | n. s.                           | n. s.                          | -                              | -                              |
| experimental temperature × parasite origin × parasite weight    | $F_{1,177} = 6.72, P = 0.010$   | n. s.                          | -                              | -                              |
| experimental temperature × parasite weight × sympatry/allopatry | -                               | -                              | n. s.                          | n. s.                          |
| host gender × host origin × parasite origin                     | n. s.                           | n. s.                          | -                              | -                              |
| host gender × host origin × parasite weight                     | n. s.                           | n. s.                          | -                              | -                              |
| host gender × parasite origin × parasite weight                 | n. s.                           | n. s.                          | -                              | -                              |
| host gender × parasite weight × sympatry/allopatry              | -                               | -                              | n. s.                          | n. s.                          |
| host origin × parasite origin × parasite weight                 | n. s.                           | n. s.                          | -                              | -                              |

**Table S4.** Technical reasons for excluding 11 sticklebacks from data analysis.

| count | technical reason                                              |
|-------|---------------------------------------------------------------|
| 2     | stickleback infected with two <i>S. solidus</i> plerocercoids |
| 1     | stickleback with deformed tail                                |
| 2     | gender of the stickleback could not be determined             |
| 1     | kidney was extremely swollen                                  |
| 3     | stickleback disappeared                                       |
| 1     | stickleback did not eat the copepod                           |
| 1     | sham exposed stickleback was <i>S. solidus</i> infected       |

**Table S5.** Distribution of dead sticklebacks over experimental treatments. 'Count' gives the number of dead sticklebacks in the order males/females/unknown gender. Symbols: '?', host infection status unknown.

| Experimental temperature (°C) | host infection status    | host origin | parasite origin | count |
|-------------------------------|--------------------------|-------------|-----------------|-------|
| 18                            | sham exposed             | cold        | -               | -/-/5 |
| 18                            | sham exposed             | warm        | -               | -/-/6 |
| 18                            | ?                        | cold        | cold            | -/-/1 |
| 18                            | ?                        | cold        | warm            | -/-/1 |
| 18                            | ?                        | warm        | cold            | -/-/2 |
| 18                            | ?                        | warm        | warm            | -/-/1 |
| 13                            | sham exposed             | cold        | -               | -/1/- |
| 13                            | infected                 | cold        | warm            | -/-/1 |
| 24                            | exposed but not infected | warm        | cold            | 1/-/- |
| 24                            | sham exposed             | cold        | -               | -/-/1 |
| 24                            | sham exposed             | warm        | -               | -/-/1 |
| 24                            | exposed but not infected | cold        | cold            | -/1/- |
| 24                            | exposed but not infected | warm        | cold            | 2/-/1 |
| 24                            | exposed but not infected | warm        | warm            | -/-/1 |
| 24                            | infected                 | cold        | cold            | 1/1/2 |
| 24                            | infected                 | warm        | cold            | 2/2/- |
| 24                            | infected                 | warm        | warm            | 2/1/1 |
| 24                            | ?                        | warm        | warm            | -/-/1 |
